# Supplementary material for: Is There a Role for Large Exome Sequencing in the Management of Metastatic Non-Small Cell Lung Cancer: A Brief Report of Real Life
Source: PubMed Central journal article supplement (PMC8940536; doi:10.3389/fonc.2022.863057), 2022-03-07
Supplement: DataSheet_1.pdf [file DataSheet_1.pdf]

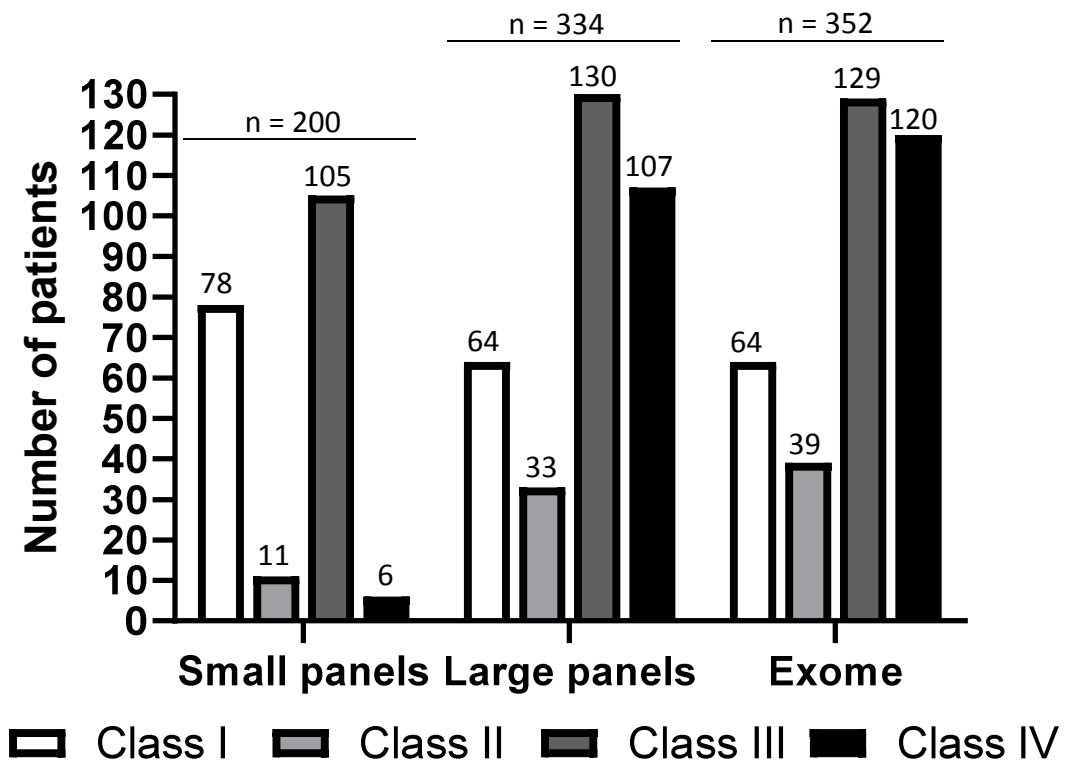

Supplementary Figure 1

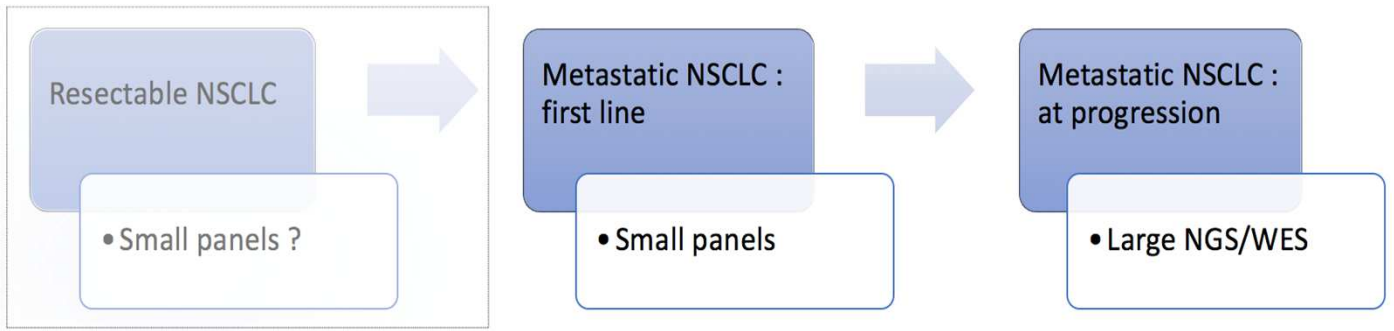

Supplementary Figure 2
